1 **Identification of Genetically Important Individuals of the Rediscovered Floreana**  
2 **Galápagos Giant Tortoise (*Chelonoidis elephantopus*) Provide Founders for Species**  
3 **Restoration Program**

4 Joshua M. Miller<sup>1†\*</sup>, Maud C. Quinzin<sup>1†</sup>, Nikos Poulakakis<sup>2,3</sup>, James P. Gibbs<sup>4</sup>, Luciano B.  
5 Beheregaray<sup>5</sup>, Ryan C. Garrick<sup>6</sup>, Michael A. Russello<sup>7</sup>, Claudio Ciofi<sup>8</sup>, Danielle L. Edwards<sup>9</sup>,  
6 Elizabeth A. Hunter<sup>10</sup>, Washington Tapia<sup>11,12</sup>, Danny Rueda<sup>12</sup>, Jorge Carrión<sup>12</sup>, Andrés A.  
7 Valdivieso<sup>1</sup>, Adalgisa Caccone<sup>1\*</sup>

8

- 9 1. Department of Ecology and Evolutionary Biology, Yale University, 21 Sachem St. New  
10 Haven, Connecticut, 06520, United States of America
- 11 2. Department of Biology, School of Sciences and Engineering, University of Crete,  
12 Vasilika Vouton, Gr-71300, Heraklio, Crete, Greece
- 13 3. Natural History Museum of Crete, School of Sciences and Engineering, University of  
14 Crete, Knossos Av., GR-71409, Heraklio, Crete, Greece
- 15 4. College of Environmental Science & Forestry, State University of New York, Syracuse,  
16 New York, 13210, United States of America
- 17 5. Molecular Ecology Lab, School of Biological Sciences, Flinders University, GPO  
18 Box 2100, Adelaide, SA, 5001, Australia
- 19 6. Department of Biology, University of Mississippi, Oxford, Mississippi, 38677, United  
20 States of America
- 21 7. Department of Biology, University of British Columbia, Okanagan Campus, Kelowna,  
22 BC V1V 1V7, Canada
- 23 8. Department Biology, University of Florence, 50019 Sesto Fiorentino (FI), Italy
- 24 9. Life and Environmental Sciences, University of California, Merced, 5200 N Lake Rd,  
25 Merced, California, 95343, United States of America
- 26 10. Department of Natural Resources and Environmental Science, University of Nevada –  
27 Reno, Max Fleischmann Agricultural Building, Reno NV 89557 USA
- 28 11. Galapagos Conservancy, Fairfax, Virginia, 22030, United States of America
- 29 12. Galápagos National Park Directorate, Puerto Ayora, Galápagos, Ecuador

30 \*Corresponding authors: [joshua.miller@yale.edu](mailto:joshua.miller@yale.edu), [adalgisa.caccone@yale.edu](mailto:adalgisa.caccone@yale.edu)

31 †These authors contributed equally to this work

## 32 **Abstract**

33 Species are being lost at an unprecedented rate due to human-driven environmental changes. The  
34 cases in which species declared extinct can be revived are rare. However, here we report that a  
35 remote volcano in the Galápagos Islands hosts many giant tortoises with high ancestry from a  
36 species previously declared as extinct: *Chelonoidis elephantopus* or the Floreana tortoise. Of 150  
37 individuals with distinctive morphology sampled from the volcano, genetic analyses revealed  
38 that 65 had *C. elephantopus* ancestry and thirty-two were translocated from the volcano's slopes  
39 to a captive breeding center. A genetically informed captive breeding program now being  
40 initiated will, over the next decades, return *C. elephantopus* tortoises to Floreana Island to serve  
41 as engineers of the island's ecosystems. Ironically, it was the haphazard translocations by  
42 mariners killing tortoises for food centuries ago that created the unique opportunity to revive this  
43 "lost" species today.

44

## 45 **Introduction**

46 Human activities have generated an extreme and rapid loss of biodiversity<sup>1</sup>. Many actions  
47 have been undertaken to prevent species extinctions, including creating laws to protect  
48 endangered species and critical habitats<sup>2</sup>, translocations of individuals among populations or into  
49 new habitats<sup>3,4</sup>, and *ex situ* management including captive breeding<sup>5</sup>. For many species, such  
50 actions come too late to facilitate recovery<sup>6-8</sup>. Although 'de-extinction' using laboratory  
51 techniques is currently being debated<sup>9</sup>, such methods are viable only for some taxa and will  
52 generate significant anticipated, and unanticipated, risks<sup>10,11</sup>. Generally, extinction is final and  
53 cases where lost species can be revived will be extremely rare.

54 Despite their insularity, even remote oceanic islands are not exempt from rapid  
55 anthropogenic changes. For example, the ecosystems of the Galápagos Islands, located ~900  
56 kilometers off the Pacific coast of Ecuador, have been degraded by human activities since the  
57 archipelago was discovered in 1535. The resulting loss of biodiversity, including many endemic  
58 species, has been chiefly due to the introduction of non-native species<sup>12,13</sup>. In response, concerted  
59 efforts have been taken to restore ecosystems on the islands, including removal of introduced  
60 pests<sup>14,15</sup> and population restoration via captive breeding and repatriation of threatened native  
61 species (e.g. <sup>16,17</sup>).

62 Galápagos giant tortoises (*Chelonoidis* spp.) are flagship species for ongoing restoration  
63 efforts<sup>18</sup> in this archipelago and play an important functional role as mega-herbivores in the  
64 islands' ecosystems<sup>19</sup>. Galápagos giant tortoises can be classified into 15 species based on  
65 genetic data<sup>20</sup>. Generally, there is a single species per island with two exceptions: Isabela Island  
66 that has a different endemic species associated with each of its five volcanoes, and Santa Cruz  
67 Island that contains two species, one recently described<sup>20</sup> (Figure 1a). The 15 species exhibit two  
68 general carapace shapes: "domed," a rounded cupola-like form (Figure 1c), and a "saddle-  
69 backed" form, with a high anterior opening creating the shape of a saddle (Figure 1d). Five of the  
70 15 species have the saddle-backed morphology: *C. elephantopus* (Floreana), *C. hoodensis*  
71 (Española), *C. abingdoni* (Pinta), *C. ephippium* (Pinzón), and *C. chathamensis* (San Cristóbal;  
72 Figure 1a).

73 Over the past three centuries, all giant tortoise populations experienced a ~90% decline<sup>21</sup>,  
74 having been killed mostly for food and oil by whalers, sealers, buccaneers, and early  
75 colonists<sup>22,23</sup>. Four species have been declared Extinct<sup>24</sup>, including two of the five saddle-backed  
76 species: *C. elephantopus* from Floreana Island and, most recently, *C. abingdoni*, from Pinta  
77 Island. The latter species was represented by a single individual, Lonesome George, until his  
78 death in 2012.

79 Surprisingly, recent research found living, wild tortoises with genetic ancestry from two  
80 of the extinct saddle-backed species, *C. elephantopus* and *C. abingdoni* (hereafter referred to as  
81 the Floreana and Pinta tortoises, respectively) outside their native range<sup>25-28</sup>. These individuals,  
82 likely the descendants of tortoises translocated among islands by mariners<sup>22,23,29</sup>, were discovered  
83 on the remote Volcano Wolf on Isabela Island (Figure 1a,b). Among >1600 tortoises sampled  
84 from Volcano Wolf in 2008 during an exploratory expedition, 105 individuals were admixed  
85 between the locally endemic species, *C. becki*, and the Floreana ( $n = 86$ )<sup>5</sup> or Pinta ( $n = 17$ )<sup>4</sup>  
86 species. The majority of these genetically admixed individuals were found on Volcano Wolf's  
87 western slopes, facing Banks Bay (also known as Puerto Bravo, PBR: Figure 1b), with a smaller  
88 number located on the volcano's northwestern slopes near Piedras Blancas (PBL)<sup>25,26</sup>. No  
89 purebred individuals of either of the two non-native species were found in 2008, but genetic  
90 simulations and the young age of some mixed ancestry individuals indicated that purebred  
91 Floreana and Pinta tortoises might still be present on Volcano Wolf<sup>25,26</sup>.

92 Here we build on this previous work. In November 2015 we mounted a 10-day-long  
93 search involving ~70 field personnel combined with helicopter- and ship-support. Focusing our  
94 search, we explored zones of Volcano Wolf most likely to contain individuals with ancestry from  
95 these two “lost” species (Figure 1b) and restricted genetic sampling to those individuals with  
96 saddle-backed morphology among the thousands of locally endemic domed *C. becki*. We then  
97 assigned ancestry to these tortoises using reference databases containing both extant and extinct  
98 species that have previously been used to assign ancestry to tortoises in the wild and captivity<sup>25-</sup>  
99 <sup>31</sup>. Based on these assignments, we determined suitability of the tortoises for a genetically  
100 informed captive breeding program aimed at reintroducing these key ecosystem engineers to  
101 their native island.

102

### 103 **Results & Discussion**

104 In total, we encountered 144 individuals with saddle-backed morphology. Of those, 112  
105 were released after taking blood samples, and 32 with pronounced saddle-backed morphology  
106 were transported to the Galápagos National Park Service’s captive tortoise breeding facility on  
107 Santa Cruz Island<sup>32-34</sup>. We assigned ancestry to all 144 of these individuals along with six  
108 saddle-backed tortoises known to have Floreana ancestry<sup>35</sup> already residing at the breeding  
109 center using information from ~700-bp of mitochondrial DNA sequence and diploid genotypes  
110 from 12 nuclear microsatellite loci. These loci have previously been shown to accurately assign  
111 individuals to tortoise species<sup>25-31</sup>.

112 Thirty-five of the 150 individuals analyzed had a mitochondrial DNA haplotype  
113 diagnostic of the Floreana species (Supplementary Figure S1). The remaining individuals either  
114 had haplotypes diagnostic of the Critically Endangered Española Island species ( $n = 70$ ),  
115 haplotypes shared between the Santiago Island and Volcano Wolf species ( $n = 44$ ), or a  
116 haplotype shared between the species from San Cristóbal and Santa Cruz Islands ( $n = 1$ ). The  
117 proportions of haplotypes associated with the Española and Floreana Island species reported here  
118 (46% and 23%, respectively) are substantially higher than previously detected among individuals  
119 from Volcano Wolf<sup>25,26</sup> (5% and 2%). This is likely due to our targeting of saddle-backed  
120 individuals in 2015 versus sampling broadly during previous surveys<sup>25-28</sup>.

121 Bayesian clustering analyses of microsatellite genotypic data using the method  
122 implemented in STRUCTURE<sup>36</sup> revealed that 127 of the 150 tortoises sampled have ancestry



123 assignments (Q-values) to the extinct Floreana species (average Q-value  $\pm$  SD =  $0.87 \pm 0.21$ ;  
124 range 0.16–0.99; Figure 2; Supplementary Figures S4-S6). Twenty-three individuals did not  
125 show evidence of Floreana ancestry, being assigned to the two genetically distinct populations  
126 (PBL and PBR) of *C. becki*, the endemic Volcano Wolf species. Of those individuals with  
127 Floreana Q-values, 30 had Floreana mitochondrial haplotypes (Figure 2).

128 We conducted additional assignment tests using genotypes generated by simulated  
129 matings within and among four possible parental lineages (PBL, PBR, Española Island, and  
130 Floreana Island). Use of simulated individuals in assignment tests has been suggested to improve  
131 accuracy and efficiency when distinguishing hybrid individuals<sup>37</sup>. Q-values from STRUCTURE  
132 for the simulated hybrids were in the range expected for each “class” of hybrid (Supplementary  
133 Figure S4), indicating we have the ability to identify individuals with Floreana ancestry across  
134 various levels of admixture.

135 Analyses with the program GeneClass2 version 2.0<sup>38</sup> identified two tortoises with strong  
136 assignment to the Floreana species, being classified as either purebreds or backcrosses between a  
137  $F_1 \times$  purebred Floreana tortoise (Supplementary Table S2). This program also identified  
138 additional 63 tortoises that were assigned to categories with Floreana ancestry. Further analysis  
139 of these individuals found a large number of  $F_1$  hybrids and backcrosses both when re-running  
140 STRUCTURE (Q-values between 0.40–0.77; Supplementary Table S2), as well as when we used  
141 NEWHYBRIDS version 1.1<sup>39</sup> (Table 1) and discriminant analysis of principal components  
142 (DAPC ; Figure 3, Table 1). Admixture between the saddle-backed species from Floreana and  
143 Española Islands ( $n = 43$ ) was more common than between Floreana and either of the two  
144 endemic domed *C. becki* populations (PBL and PBR;  $n = 22$ ), indicative of positive assortative  
145 mating between the two saddle-backed species.

146 A critical factor when planning a captive breeding program is having accurate ancestry  
147 assignments. To examine the precision and accuracy of our ancestry assignments we conducted  
148 additional analyses in STRUCTURE. First, jackknifing the loci to test robustness of Q-values to  
149 reductions in the number of markers, and using the ANCESTDIST option in STRUCTURE,  
150 which collects information about the distribution of Q-values for each individual in our dataset.  
151 Jackknifing showed that individual Q-values were robust to reductions in the number of markers:  
152 average variation in individual Q-values was 0.027 (SD=0.033, range <0.001-0.149;  
153 Supplementary Figure S5). Second, use of the ANCESTDIST option highlighted that, as

154 expected, for hybrid individuals there is uncertainty around the specific estimate of Q-values  
155 (range 0.002-0.484; Supplementary Figure S6). Inclusion of the simulated individual in our  
156 STRUCTURE run led to a general decrease in the magnitude of Q-values observed  
157 (Supplementary Table S2 and Supplementary Figure S7). Taken together, these analyses suggest  
158 that Q-values should not be taken as direct measure of proportional ancestry, but that our  
159 markers are powerful in detecting the presence of ancestry from the extinct Floreana species.

160       Neither mitochondrial DNA nor microsatellite data identified individuals with ancestry  
161 from the Pinta Island species. However, a previous genetic estimate suggested that only 60–70  
162 tortoises with Pinta ancestry are present on Volcano Wolf<sup>25</sup>, whereas capture-mark-recapture  
163 methods employed during our expedition estimated that a total of ~5,000–6,000 tortoises  
164 occurred in the area searched. Moreover, despite our substantial search effort, we explored only  
165 ~26% of the total tortoise-occupied range on the volcano (J. Gibbs unpublished data). Therefore,  
166 it is possible that individuals with Pinta ancestry still live on Volcano Wolf, but went undetected  
167 in 2015.

168       Of the 38 individuals currently housed in the captive breeding center, 23 tortoises (9  
169 males and 14 females) were found to have nuclear ancestry from Floreana across multiple  
170 assignment methods (Table 1) with Q-values from STRUCTURE ranging between 0.44–0.77,  
171 when simulated individuals were also included in the analyses. In addition, 12 of these 23  
172 individuals have mitochondrial haplotypes from the Floreana species (Supplementary Table S2).  
173 Together, these 23 individuals now form the core of a genetically-informed captive breeding  
174 program aimed at repatriation of tortoises to Floreana Island. For the purposes of the breeding  
175 program, all 23 genetically important individuals will be included, regardless of mitochondrial  
176 lineage, in order to capture and maintain as much nuclear genetic diversity from the Floreana  
177 species as possible. The program is modeled after another one developed for the Española  
178 species initiated with only 15 founders. Over 50 years, the Española tortoise program generated  
179 >2000 repatriates with nearly 1,000 surviving tortoises now reproducing independently on their  
180 native island<sup>17,40,41</sup>.

181       A key attribute for success of such breeding programs is that the founding individuals are  
182 unrelated, as high relatedness can lead to inbreeding depression. Accordingly, we examined  
183 relatedness among the 23 individuals with Floreana ancestry in the breeding center. The analysis  
184 showed that most individuals were unrelated (average Queller and Goodnight's<sup>42</sup> relatedness = -

185 0.04, range -0.58–0.63; Supplementary Figure 3). Although the 23 tortoises in captivity represent  
186 a promising founding population, 44 tortoises identified during the 2015 expedition, but left on  
187 Volcano Wolf, are also good candidates for the Floreana breeding and repatriation program  
188 (Table 1). These individuals, once re-located on Volcano Wolf, could be incorporated into the  
189 breeding program to further expand the genetic diversity of the founder population.

190 The Floreana tortoise breeding program will be designed to maximize founder  
191 contributions and *C. elephantopus* genome representation in the resulting progeny, while  
192 promoting *in situ* population growth and minimizing costs to the Galápagos National Park  
193 Directorate. Depending on the goals and priorities of Park decision-makers, complete genome  
194 recovery may not be reached before releases of offspring begin. However, the high proportion of  
195 Floreana ancestry and low relatedness evident in the current breeding individuals indicate that  
196 the 23 founding individuals and their resulting progeny will provide a good starting point for  
197 restoring the species.

198 Our discovery raises the possibility that the extinct Floreana species could be revived. In  
199 this case, tortoises with Floreana ancestry are living ‘genomic archives’ that retain the  
200 evolutionary legacy of the extinct species, removing the need for the cloning methods that have  
201 been proposed to bring back extinct species<sup>43</sup>. The Floreana tortoise breeding program is  
202 anticipated to generate thousands of offspring over the next few decades. When repatriated to  
203 Floreana Island, these tortoises can once again play their critical role as ecosystem engineers<sup>19</sup>.  
204 In addition, giant tortoises are a major tourist attraction in Galápagos<sup>44</sup>; tortoise restoration on  
205 Floreana Island should create new economic opportunities for the island’s few human residents.  
206 Ironically, the opportunity to revive this “lost species” today was created by the same early  
207 visitors to the archipelago whose activities imperiled most giant tortoise species and drove some  
208 into outright extinction.

209

## 210 **Materials and Methods**

### 211 **Sampling and lab methods**

212 All samples were collected under CITES permit 15US209142/9, Galápagos Park Permit  
213 PC-75-16, and in accordance with Yale Institutional Animal Care and Use Committee (IACUC)  
214 permit number 2016-10825. Samples were collected over a 10-day expedition in November 2015  
215 by a team of 36 researchers plus Galápagos National Park rangers. Groups of 3–4 searchers were

216 assigned distinct areas on Volcano Wolf, collectively totaling ~36 km<sup>2</sup>. The search area was  
217 chosen based on a previous survey of tortoises on Volcano Wolf, which indicated that  
218 individuals with Pinta and Floreana ancestry were found to be in their highest densities on the  
219 western slopes of Volcano Wolf<sup>25</sup>. For all tortoises encountered, sex, age, and GPS coordinates  
220 were recorded; for saddle-backed individuals, photographs were taken, blood samples were  
221 collected for DNA analysis, and each individual was injected with a passive integrated  
222 transponder (PIT) tag under the skin for identification in the future. In cases where blood was  
223 taken, ~2 ml of blood was collected from the brachial vein of one of the front legs of the tortoise  
224 and preserved in a lysis buffer containing 0.1 M Tris buffer, 0.1 M EDTA, 0.2 m NaCl, and 1%  
225 SDS, pH 8.0. All tortoises were uniquely marked with paint when first encountered. Starting on  
226 the sixth day, we re-searched areas and recorded whether any individual had been previously  
227 encountered for the purposes of a capture-mark-recapture estimate of population size. In total,  
228 1,333 tortoises were encountered, of which 144 had saddle-backed morphology. The 32 tortoises  
229 removed from Volcano Wolf were initially carried in nets by helicopter from the flanks of the  
230 volcano to the expedition ship anchored in Puerto Bravo harbor, and then transported to the  
231 Galápagos National Park captive tortoise breeding facility on Santa Cruz Island.

232 DNA was extracted from 150 blood samples using Qiagen blood and tissue extraction  
233 kits. These samples included the 144 saddle-backed individuals mentioned above along with six  
234 individuals already housed at the Galápagos National Park Breeding Center on Santa Cruz Island  
235 that were previously identified to have Floreana ancestry<sup>35</sup>. All samples were sequenced at  
236 ~700bp of the mitochondrial DNA control and were genotyped at 12 dinucleotide  
237 microsatellites, using previously developed protocols (detailed procedures in Supplementary  
238 Methods).

### 239 **Ancestry assignment**

240 For ancestry assignment based on mitochondrial DNA, the new sequences were aligned  
241 to a reference database of 123 previously observed haplotypes, representing all extant and extinct  
242 species<sup>29</sup>. Ancestry was assigned by determining shared haplotypes using the program TCS  
243 version 1.21<sup>45</sup>. Evolutionary relationships were viewed with the program Network version 5.0  
244 (fluxus-engineering.com; Supplementary Figure 1).

245 For ancestry assignment based on microsatellite genotypic data, we took a two-step  
246 process using STRUCTURE version 2.3.4<sup>36,46</sup>. First, we ran STRUCTURE with a reference

247 dataset of 277 samples including all extant and extinct species to confirm the number of expected  
248 genetic clusters ( $K$ ) present in the archipelago (for full parameters see Supplementary Methods).  
249 In this case, the optimal  $K$  was 12, which corresponds to previously described results<sup>25,26</sup>  
250 (Supplementary Figure 2). Second, with archipelago-wide  $K$  established, we reduced the  
251 reference dataset to the seven clusters previously found to be on Volcano Wolf<sup>29</sup>: Española, San  
252 Cristóbal, Central Isabela (La Cazuela, Volcano Alcedo, and Volcano Darwin), Floreana, Pinta,  
253 and the two genetically distinct endemic Volcano Wolf populations, PBL, and PBR. To this  
254 reduced dataset (155 reference samples in total), the new samples were added and we set  $K$  to 7,  
255 leaving all other parameters unchanged.

256 To further quantify the genetic ancestry of individuals, assignment tests were undertaken  
257 using three additional methods. Prior to implementing these methods, we expanded the reference  
258 database to include simulated genotypes. These genotypes were simulated using HYBRIDLAB  
259 version 1.0<sup>47</sup>, and corresponded to individuals arising from crosses within and among the  
260 genetically distinct *C. becki* populations on Volcano Wolf (PBL and PBR), and the two saddle-  
261 backed species from Española and Floreana (see Supplementary Methods). These four lineages  
262 were chosen due to their high prevalence in the mitochondrial DNA-based assignments and their  
263 contribution to microsatellite genotypes in admixed individuals. Simulated individuals  
264 represented explicit ancestry categories: pure parental populations, first-generation ( $F_1$ ) crosses,  
265 second-generation ( $F_2$ ) crosses, and backcrosses (i.e., matings between  $F_1$ 's and their respective  
266 purebred lineages).

267 With these new genotypes added into the reference set, we first used GeneClass version  
268 2.0<sup>38</sup> to calculate the probability that an individual's genotype assigns to a population. Second,  
269 we used NEWHYBRIDS version 1.1<sup>39</sup> to compute the posterior probability of various hybrid  
270 classes for each individual. In this case, only four pairwise combinations of parental populations  
271 were considered to focus on identifying potential hybrids involving Floreana ancestry: 1)  
272 Española  $\times$  Floreana, 2) PBL  $\times$  Floreana, 3) Floreana  $\times$  PBR, and 4) Española  $\times$  PBR. Third, we  
273 assigned ancestry using a multivariate approach, DAPC, as implemented in the R package  
274 *adegenet* version 2.0.1<sup>48,49</sup>. In this case, the simulated genotypes from crosses among Floreana,  
275 Española, PBL and PBR were initially used as a training dataset to define the principal  
276 components and discriminant functions. The empirical genotypes for putative hybrids were then  
277 transformed with principal components analysis (PCA) based on the centering and scaling of the

278 training set, and positioned onto the discriminant functions. The NEWHYBRIDS and DAPC  
279 analyses were carried out only on individuals with ancestry from Floreana based on the results  
280 from the GeneClass analyses (Supplementary Table S2). Finally, we re-ran STRUCTURE using  
281 the simulated crosses as the reference populations.

282 Precision and accuracy of ancestry estimates were tested with two additional sets of  
283 STRUCTURE analyses. First, we jackknifed our loci, sequentially removing one locus from the  
284 dataset and rerunning STRUCTURE. Second, we used the ANCESTDIST option within  
285 STRUCTURE. See Supplementary Materials for full methods.

### 286 **Relatedness Analysis**

287 For the 23 individuals in the breeding center with Floreana ancestry, we calculated  
288 pairwise relatedness using the estimator of Queller and Goodnight<sup>42</sup>. This was the highest ranked  
289 of eight tested relatedness estimators tested by the program irelr<sup>50</sup> which considers a composite  
290 score that incorporates estimates of bias, variance, skewness, and kurtosis. The empirical  
291 distribution of relatedness values was compared to the distributions of 10,000 simulated pairs of  
292 individuals for each of four relatedness categories (unrelated, half sibs, full sibs, and parent–  
293 offspring). The pairwise relatedness distribution of both the empirical and simulated data were  
294 calculated using irelr<sup>50</sup>.

### 295 **References**

- 296 1. Dirzo, R. *et al.* Defaunation in the Anthropocene. *Science (80-. )*. **345**, 401 LP-406 (2014).
- 297 2. Novacek, M. J. & Cleland, E. E. The current biodiversity extinction event: Scenarios for  
298 mitigation and recovery. *Proc. Natl. Acad. Sci. U. S. A.* **98**, 5466–5470 (2001).
- 299 3. Corlett, R. T. Restoration, Reintroduction, and Rewilding in a Changing World. *Trends*  
300 *Ecol. Evol.* **31**, 453–462 (2016).
- 301 4. Weeks, A. R. *et al.* Assessing the benefits and risks of translocations in changing  
302 environments: a genetic perspective. *Evol. Appl.* **4**, 709–725 (2011).
- 303 5. Canessa, S. *et al.* Planning for ex-situ conservation in the face of uncertainty. *Conserv.*  
304 *Biol.* **30**, 599–609 (2016).
- 305 6. Hoffmann, M. *et al.* The Impact of Conservation on the Status of the World’s Vertebrates.  
306 *Science (80-. )*. **330**, 1503–1509 (2010).
- 307 7. Doremus, H. & Pagel, J. E. Why Listing May Be Forever: Perspectives on Delisting under  
308 the U.S. Endangered Species Act. *Conserv. Biol.* **15**, 1258–1268 (2001).



- 309 8. Taylor, M. F. J., Suckling, K. F. & Rachlinski, J. J. The Effectiveness of the Endangered  
310 Species Act: A Quantitative Analysis. *Bioscience* **55**, 360–367 (2005).
- 311 9. Sherkow, J. S. & Greely, H. T. What If Extinction Is Not Forever? *Science* (80-. ). **340**,  
312 32–33 (2013).
- 313 10. Cohen, S. The Ethics of De-Extinction. *Nanoethics* **8**, 165–178 (2014).
- 314 11. Jones, K. E. From dinosaurs to dodos: who could and should we de-extinct? *Front.*  
315 *Biogeogr.* **6**, (2014).
- 316 12. Phillips, R. B., Wiedenfeld, D. A. & Snell, H. L. Current status of alien vertebrates in the  
317 Galápagos Islands: invasion history, distribution, and potential impacts. *Biol. Invasions*  
318 **14**, 461–480 (2012).
- 319 13. Guézou, A. *et al.* An Extensive Alien Plant Inventory from the Inhabited Areas of  
320 Galapagos. *PLoS One* **5**, e10276 (2010).
- 321 14. Harper, G. A. & Carrion, V. Introduced rodents in the Galapagos: colonisation, removal  
322 and the future. *Isl. Invasives Erad. Manag.* 63–66 (2011).
- 323 15. Campbell, K., Donlan, C. J., Cruz, F. & Carrion, V. Eradication of feral goats *Capra*  
324 *hircus* from Pinta Island, Galápagos, Ecuador. *Oryx* **38**, 328–333 (2004).
- 325 16. Fabiani, A. *et al.* Conservation of Galápagos land iguanas: genetic monitoring and  
326 predictions of a long-term program on the island of Santa Cruz. *Anim. Conserv.* **14**, 419–  
327 429 (2011).
- 328 17. Milinkovitch, M. C. *et al.* Genetic analysis of a successful repatriation programme: giant  
329 Galapagos tortoises. *Proc. R. Soc. B-Biological Sci.* **271**, 341–345 (2004).
- 330 18. Benitez-Capistros, F., Hugé, J., Dahdouh-Guebas, F. & Koedam, N. Exploring  
331 conservation discourses in the Galapagos Islands: A case study of the Galapagos giant  
332 tortoises. *Ambio* **45**, 706–724 (2016).
- 333 19. Gibbs, J. P., Sterling, E. J. & Zabala, F. J. Giant Tortoises as Ecological Engineers: A  
334 Long-term Quasi-experiment in the Galápagos Islands. *Biotropica* **42**, 208–214 (2010).
- 335 20. Poulakakis, N. *et al.* Description of a New Galapagos Giant Tortoise Species  
336 (Chelonoidis; Testudines: Testudinidae) from Cerro Fatal on Santa Cruz Island. *PLoS One*  
337 **10**, e0138779 (2015).
- 338 21. Márquez, C. *et al.* Estado actual de las poblaciones de tortugas terrestres gigantes  
339 (*Geochelone* spp., Chelonia: Testudinae) en las islas Galápagos. *Ecol. Apl.* **3**, (2004).



- 340 22. Porter, D. *Journal of a cruise made to the Pacific Ocean*. (Wiley & Halsted, 1822).
- 341 23. Townsend, C. H. The Galápagos tortoises in relation to the whaling industry: A study of  
342 old logbooks. *Zoologica* **4**, 55–135 (1925).
- 343 24. IUCN. The IUCN Red List of Threatened Species. Version 2016-2. (2016). Available at:  
344 [www.iucnredlist.org](http://www.iucnredlist.org). (Accessed: 10th November 2016)
- 345 25. Edwards, D. L. *et al.* The genetic legacy of Lonesome George survives: Giant tortoises  
346 with Pinta Island ancestry identified in Galapagos. *Biol. Conserv.* **157**, 225–228 (2013).
- 347 26. Garrick, R. C. *et al.* Genetic rediscovery of an ‘extinct’ Galapagos giant tortoise species.  
348 *Curr. Biol.* **22**, R10–R11 (2012).
- 349 27. Poulakakis, N. *et al.* Historical DNA analysis reveals living descendants of an extinct  
350 species of Galapagos tortoise. *Proc. Natl. Acad. Sci. U. S. A.* **105**, 15464–15469 (2008).
- 351 28. Russello, M. A. *et al.* Lonesome George is not alone among Galápagos tortoises. *Curr.*  
352 *Biol.* **17**, R317–R318 (2007).
- 353 29. Poulakakis, N., Russello, M., Geist, D. & Caccone, A. Unravelling the peculiarities of  
354 island life: vicariance, dispersal and the diversification of the extinct and extant giant  
355 Galapagos tortoises. *Mol. Ecol.* **21**, 160–173 (2012).
- 356 30. Benavides, E. *et al.* Lineage Identification and Genealogical Relationships Among  
357 Captive Galapagos Tortoises. *Zoo Biol.* **31**, 107–120 (2012).
- 358 31. Garrick, R. C. *et al.* Lineage fusion in Galapagos giant tortoises. *Mol. Ecol.* **23**, 5276–  
359 5290 (2014).
- 360 32. The Galapagos Conservancy. The Wolf Expedition: Resurrecting the extinct tortoise  
361 species from Floreana and Pinta. (2015). Available at:  
362 <http://www.galapagos.org/newsroom/wolf-tortoise-search-outcome/>.
- 363 33. Nicholls, H. Lonesome George ‘look-alike’ captured for tortoise-breeding effort. *Nature*  
364 (2015). doi:10.1038/nature.2015.18955
- 365 34. Blakeslee, S. Scientists Hope to Bring a Galápagos Tortoise Species Back to Life. *The*  
366 *New York Times* (2015).
- 367 35. Russello, M. A. *et al.* DNA from the Past Informs Ex Situ Conservation for the Future: An  
368 “Extinct” Species of Galapagos Tortoise Identified in Captivity. *PLoS One* **5**, (2010).
- 369 36. Falush, D., Stephens, M. & Pritchard, J. K. Inference of population structure using  
370 multilocus genotype data: Linked loci and correlated allele frequencies. *Genetics* **164**,

- 371 1567–1587 (2003).
- 372 37. Vähä, J.-P. & Primmer, C. R. Efficiency of model-based Bayesian methods for detecting  
373 hybrid individuals under different hybridization scenarios and with different numbers of  
374 loci. *Mol. Ecol.* **15**, 63–72 (2006).
- 375 38. Piry, S. *et al.* GENECLASS2: A Software for Genetic Assignment and First-Generation  
376 Migrant Detection. *J. Hered.* **95**, 536–539 (2004).
- 377 39. Anderson, E. C. & Thompson, E. A. A model-based method for identifying species  
378 hybrids using multilocus genetic data. *Genetics* **160**, 1217–1229 (2002).
- 379 40. Milinkovitch, M. *et al.* Giant Galapagos tortoises; molecular genetic analyses identify a  
380 trans-island hybrid in a repatriation program of an endangered taxon. *BMC Ecol.* **7**,  
381 doi:10.1186/1472-6785-7-2 (2007).
- 382 41. Gibbs, J. P., Hunter, E. A., Shoemaker, K. T., Tapia, W. H. & Cayot, L. J. Demographic  
383 Outcomes and Ecosystem Implications of Giant Tortoise Reintroduction to Española  
384 Island, Galapagos. *PLoS One* **9**, e110742 (2014).
- 385 42. Queller, D. C. & Goodnight, K. F. Estimating relatedness using genetic-markers.  
386 *Evolution (N. Y.)*. **43**, 258–275 (1989).
- 387 43. Shapiro, B. Mammoth 2.0: will genome engineering resurrect extinct species? *Genome*  
388 *Biol.* **16**, 228 (2015).
- 389 44. Medina, C., Aravena, C. & Vásquez, F. *Economic valuation of the giant tortoise*  
390 *conservation in Galapagos Islands Carlos*. (2012).
- 391 45. Clement, M., Posada, D. & Crandall, K. A. TCS: a computer program to estimate gene  
392 genealogies. *Mol. Ecol.* **9**, 1657–1659 (2000).
- 393 46. Pritchard, J. K., Stephens, M. & Donnelly, P. Inference of population structure using  
394 multilocus genotype data. *Genetics* **155**, 945–959 (2000).
- 395 47. Nielsen, E. E., Bach, L. A. & Kotlicki, P. HYBRIDLAB (version 1.0): a program for  
396 generating simulated hybrids from population samples. *Mol. Ecol. Notes* **6**, 971–973  
397 (2006).
- 398 48. Jombart, T. adegenet: a R package for the multivariate analysis of genetic markers.  
399 *Bioinformatics* **24**, 1403–1405 (2008).
- 400 49. Jombart, T. & Ahmed, I. adegenet 1.3-1: new tools for the analysis of genome-wide SNP  
401 data. *Bioinformatics* **27**, 3070–3071 (2011).

- 402 50. Gonçalves da Silva, A. & Russello, M. A. iRel: software for implementing pairwise  
403 relatedness estimators and evaluating their performance. *Conserv. Genet. Resour.* **3**, 69–  
404 71 (2011).
- 405 51. R Core Team. R: A language and environment for statistical computing, reference index  
406 version 3.2.2. (2015).
- 407 52. Hijmas, R. J. raster: Geographic Data Analysis and Modeling version 2.5-8. (2016).

408

#### 409 **Acknowledgements**

410 This work was enabled by substantial logistical and personnel support of the Galápagos National  
411 Park Directorate through its dedication to science-based conservation of giant tortoises via the  
412 “Giant Tortoise Restoration Initiative” undertaken in conjunction with the Galapagos  
413 Conservancy. Expedition expenses and laboratory analyses were also supported by grants from  
414 the Galapagos Conservancy, the Mohamed bin Zayed Species Conservation Fund, National  
415 Geographic Society, and the Oak Foundation to AC, the US National Science Foundation (DEB  
416 1258062) to JG, the Belgian American Educational Foundation to MQ, and the Yale Institute for  
417 Biospheric Studies. C. Gottsegen helped with genetic data collection, A. Antoniou provided  
418 assistance with DAPC analyses. L. Boitani, L. Cayot, C. Parker, and A. Rhodin helped procure  
419 funds and provided encouragement. J. Flanagan provided critical veterinary support. We would  
420 also like to thank C. Cullingham for insightful comments on the manuscript.

421

#### 422 **Author Contributions**

423 JMM, NP, LB, CC, EAH, WT, DR, JC, JPG and AC assisted with field logistics and sample  
424 collection. JMM, MCQ, and AV conducted laboratory analyses. JMM, MCQ, and NP conducted  
425 data analyses. LBB, RCG, MAR, and DLE provided technical guidance and conceptual advice  
426 for data analyses. JMM drafted the manuscript with assistance from MCQ, LBB, MAR, JPG, and  
427 AC. JMM, MCQ, NP, LBB, RCG, MAR, CC, DLE, EAH, WT, JPG, and AC discussed the  
428 results and implications and commented on the manuscript at all stages.

429

#### 430 **Additional Information**

431 Microsatellite genotypes and mitochondrial sequences are available on a server hosted by the  
432 College of Environmental Science & Forestry, State University of New York, Syracuse

433 ([http://www.esf.edu/efb/gibbs/Miller\\_et\\_al\\_data\\_archive.zip](http://www.esf.edu/efb/gibbs/Miller_et_al_data_archive.zip)). The authors have no financial  
434 conflicts of interest. Correspondence and requests for materials should be addressed to either  
435 [joshua.miller@yale.edu](mailto:joshua.miller@yale.edu) or [adalgisa.caccone@yale.edu](mailto:adalgisa.caccone@yale.edu).  
436

437 **Figures**

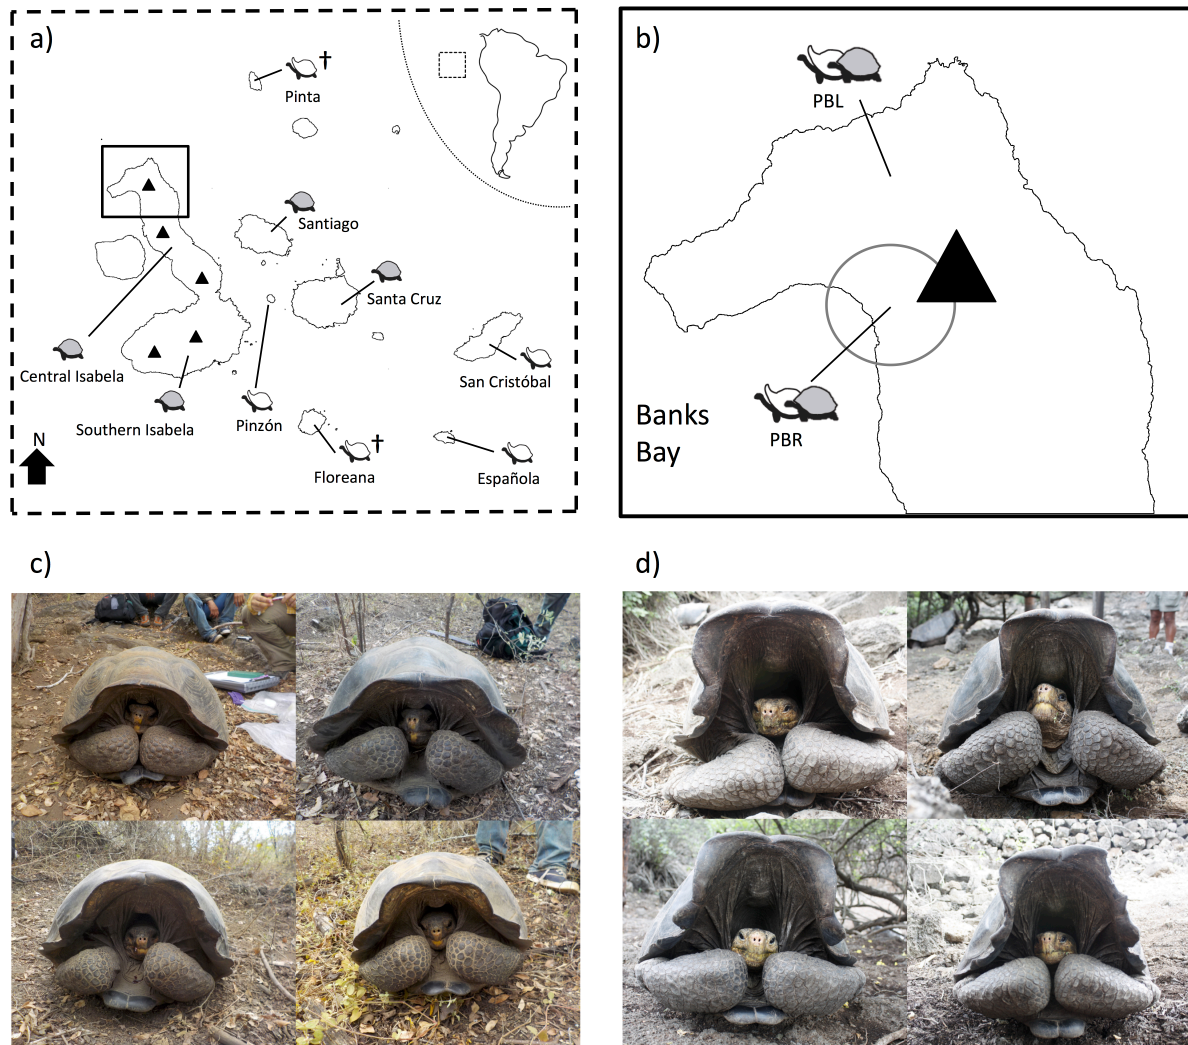

438

439 **Figure 1: Distribution of tortoises among Galápagos Islands and representative photos of tortoise**

440 **carapace morphology. A) Map of the distribution of tortoises among Galápagos Islands**

441 **along with cartoons indicating carapace morphology for each. Light grey shading**

442 **indicates domed morphology, unshaded indicates saddle-backed. Extinct species are noted**

443 **with †. B) Larger view of Volcano Wolf on northern Isabela Island. The circle indicates**

444 **the approximate field location of the current study. Examples of Galápagos giant tortoises**

445 **with domed (C) saddle-backed (D) morphology. Maps were created with R (version**

446 **3.2.4<sup>51</sup>) using the raster package (version 2.5-8<sup>52</sup>).**

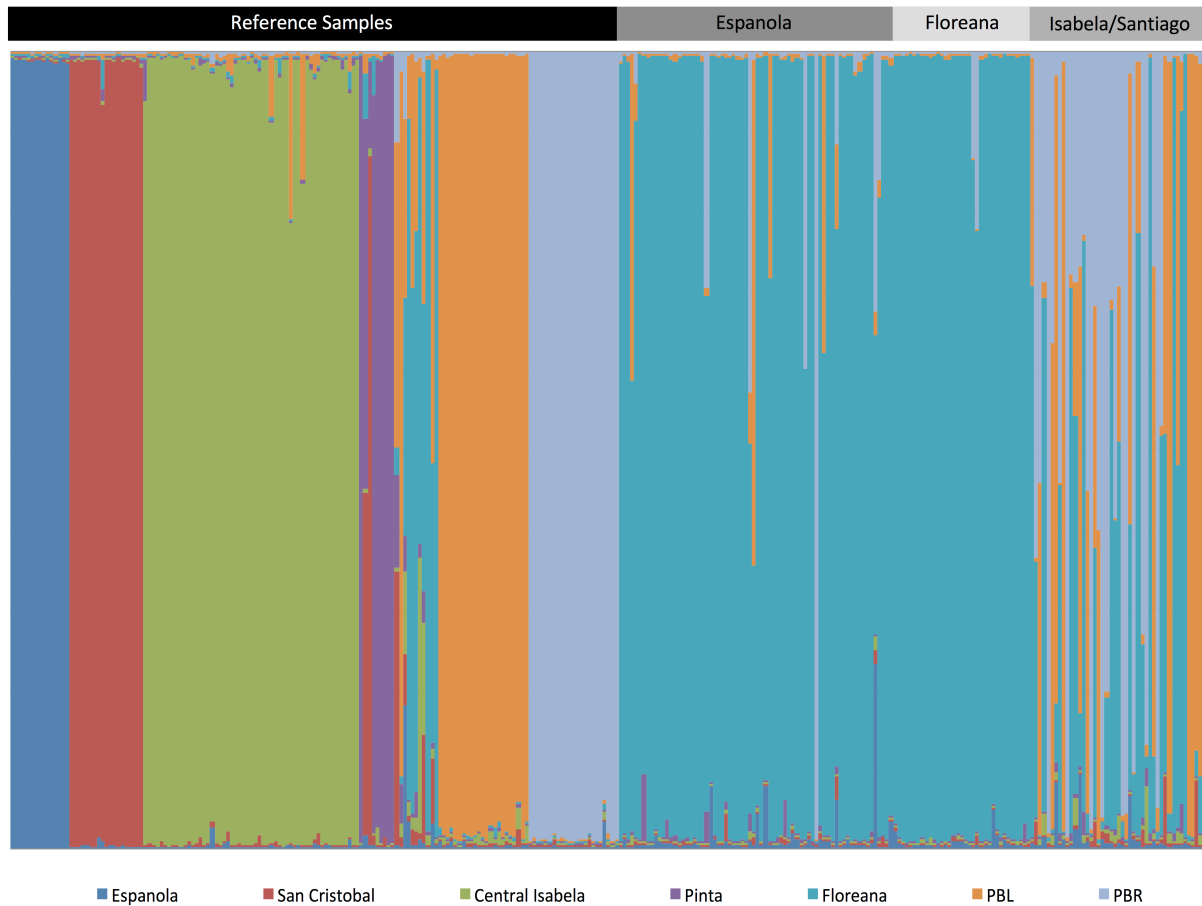

447

448 Figure 2: STRUCTURE<sup>36,46</sup> plot for 155 reference samples along with the 150 newly collected  
449 individuals. Each individual is represented as a vertical bar, with colors denoting the  
450 different genetic clusters, as indicated below. The proportion of color in a bar is equal to  
451 the ancestry (Q-value) to a given cluster. Reference samples are those under the black  
452 horizontal bar, the newly collected samples are those under the grey horizontal bar with  
453 shades and labels corresponding to mitochondrial lineage (the final sample on the far right  
454 has a haplotype shared by the Islands of San Cristóbal and Santa Cruz).



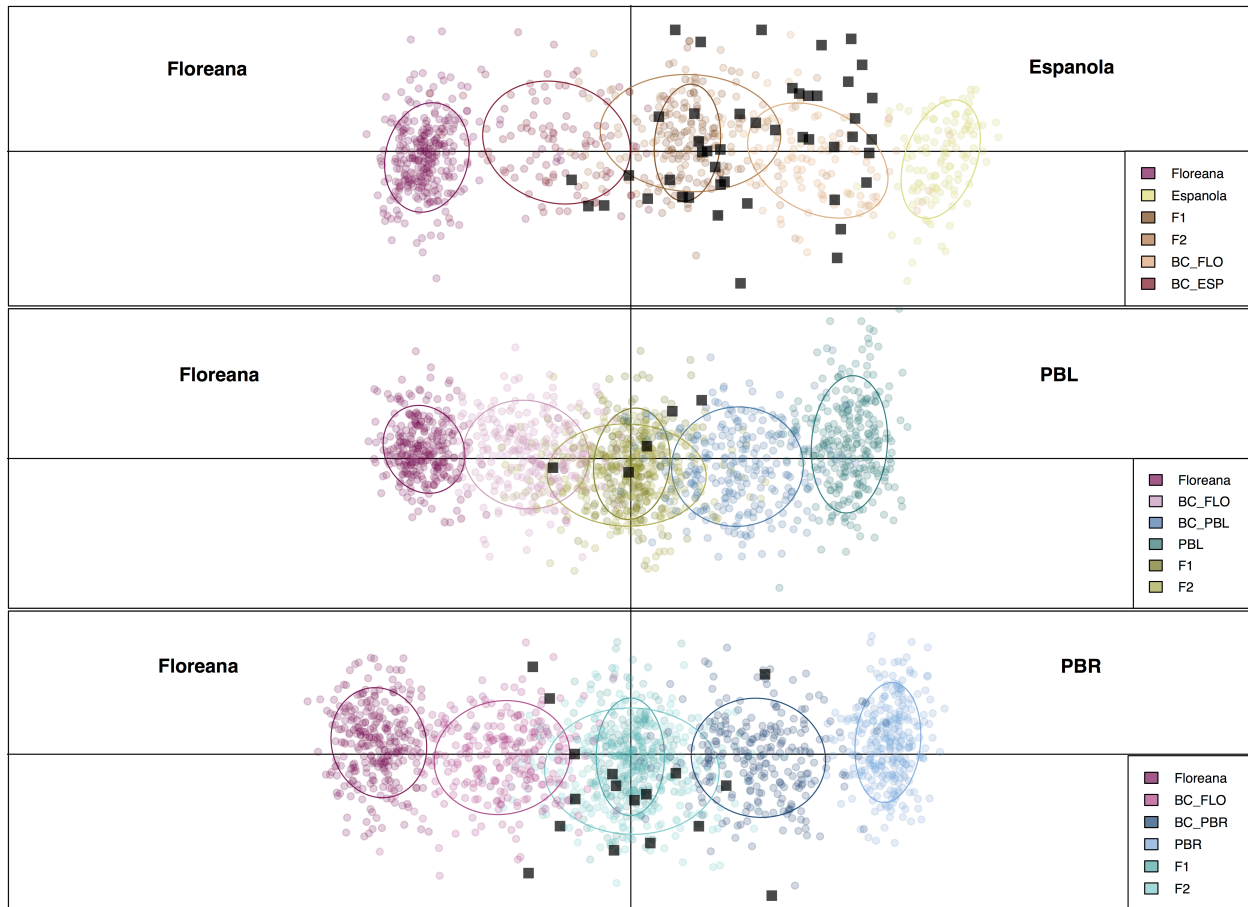

455

456 Figure 3: Scatterplot of the first two principal components of DAPC showing assignment of  
457 unknown individuals to ancestry categories. The rows show pairwise combinations of  
458 parental populations. Top: Española × Floreana; middle: Floreana × PBL; bottom:  
459 Floreana × PBR. Parental populations are positioned at the ends of each plot with color  
460 coded first generation (F<sub>1</sub>), second generation (F<sub>2</sub>), and each backcross (BC) individuals  
461 between them. Ellipses encompass ~67% of the cloud of points for each group. These  
462 genotypes were used as a training set to define the discriminant functions and optimal  
463 number of PCs to retain. The Volcano Wolf tortoises with mixed ancestry are identified  
464 by black squares where placement is based on the previously defined discriminant  
465 functions.



466 Table 1: Number of individuals assigned to ancestry categories by DAPC (A) and  
 467 NEWHYBRIDS (B)

468 A)

| <b>Location</b> |     | <b>BC to<br/>ESP</b> | <b>BC to<br/>FLO</b> | <b>BC to<br/>PBL</b> | <b>BC to<br/>PBR</b> | <b>FLO/ESP<br/>F<sub>1</sub> or F<sub>2</sub></b> | <b>FLO/PBL<br/>F<sub>1</sub> or F<sub>2</sub></b> | <b>FLO/PBR<br/>F<sub>1</sub> or F<sub>2</sub></b> | <b>Total</b> |
|-----------------|-----|----------------------|----------------------|----------------------|----------------------|---------------------------------------------------|---------------------------------------------------|---------------------------------------------------|--------------|
|                 | PNG | 9                    | 2                    | 0                    | 0                    | 8                                                 | 1                                                 | 3                                                 | 23           |
|                 | VW  | 13                   | 5                    | 1                    | 3                    | 12                                                | 2                                                 | 8                                                 | 44           |
| <b>Total</b>    |     | 22                   | 7                    | 1                    | 3                    | 20                                                | 3                                                 | 11                                                | 67           |

469

470 B)

| <b>Location</b> |     | <b>BC to<br/>ESP</b> | <b>BC to<br/>FLO</b> | <b>BC to<br/>PBL</b> | <b>BC to<br/>PBR</b> | <b>FLO/ESP<br/>F<sub>1</sub> or F<sub>2</sub></b> | <b>FLO/PBL<br/>F<sub>1</sub> or F<sub>2</sub></b> | <b>FLO/PBR<br/>F<sub>1</sub> or F<sub>2</sub></b> | <b>Total</b> |
|-----------------|-----|----------------------|----------------------|----------------------|----------------------|---------------------------------------------------|---------------------------------------------------|---------------------------------------------------|--------------|
|                 | PNG | 0                    | 12                   | 0                    | 0                    | 4                                                 | 1                                                 | 2                                                 | 19           |
|                 | VW  | 0                    | 7                    | 0                    | 0                    | 17                                                | 4                                                 | 8                                                 | 36           |
| <b>Total</b>    |     | 0                    | 19                   | 0                    | 0                    | 21                                                | 5                                                 | 10                                                | 55           |

471

472 The current location of individuals is listed, as Galápagos National Park Breeding Center (PNG)  
 473 or Volcano Wolf (VW). Abbreviations are: BC = backcross, F<sub>1</sub> = first generation mating, F<sub>2</sub> =  
 474 second generation mating (F<sub>1</sub> x F<sub>1</sub>), ESP = Española, and FLO = Floreana. Note that the total  
 475 number of samples assigned differs between the two methods as some individuals did not exceed  
 476 the posterior probability threshold for classification in NEWHYBRIDS (see Supplementary  
 477 Methods).
